# Supplementary material
Source: PubMed Central journal article supplement (PMC2947596)
Supplement: NIHMS231459-supplement-1.pdf [file NIHMS231459-supplement-1.pdf]

# Keratin 17 promotes epithelial proliferation and tumor growth by polarizing the immune response in skin

Daryle DePianto, Michelle Kerns, Andrzej A. Dlugosz and Pierre A. Coulombe

## Supplemental Figure 1

DePianto et al.

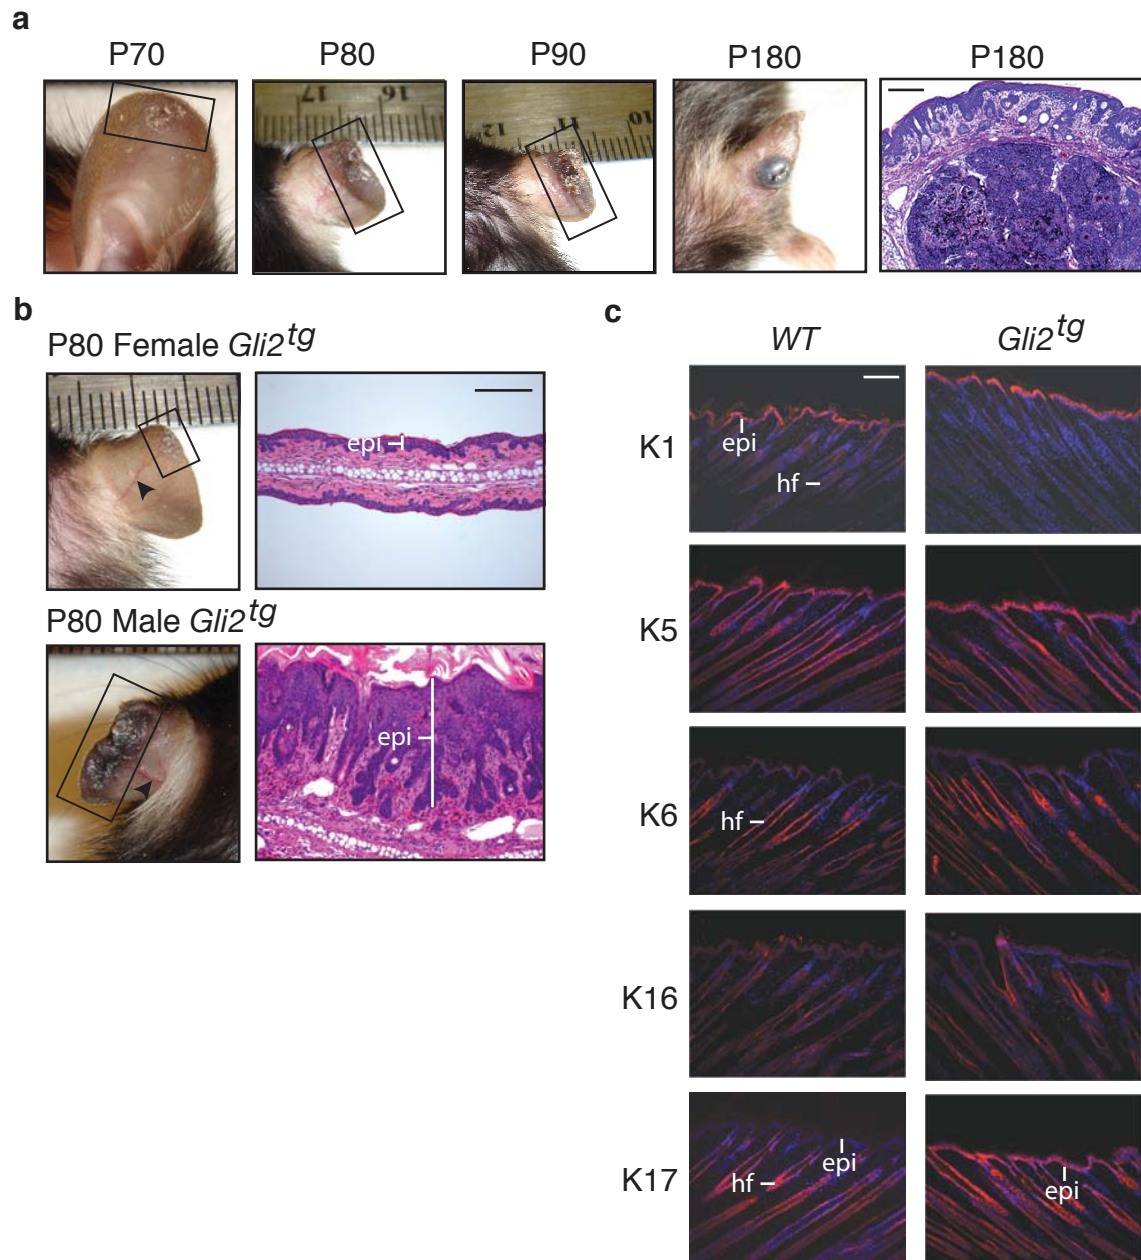

### Characterization of the *Gli2<sup>tg</sup>* mouse model of basal cell carcinoma.

**(a)** Macroscopic presentation of developing ear lesions at ages P70, P80, and P90 in male *Gli2<sup>tg</sup>* mice. **(b)** Gender bias within the *Gli2<sup>tg</sup>* mouse model. Female mice have a delayed onset of ear lesions compared to males (compare boxed areas). Arrows denote blood vessels, which get progressively larger as tumorigenesis proceeds. **(c)** Keratin expression in back skin of P14 wild type (*WT*) and *Gli2<sup>tg</sup>* mice. The antigen being detected is given at left. K17 is robustly induced in interfollicular epidermis of *Gli2<sup>tg</sup>* backskin, and is the only keratin epitope, among those surveyed, showing an altered regulation at P14. Epi, epidermis; hf, hair follicle. Scale bars: 25 $\mu$ m.

## Supplemental Figure 2

DePianto et al.

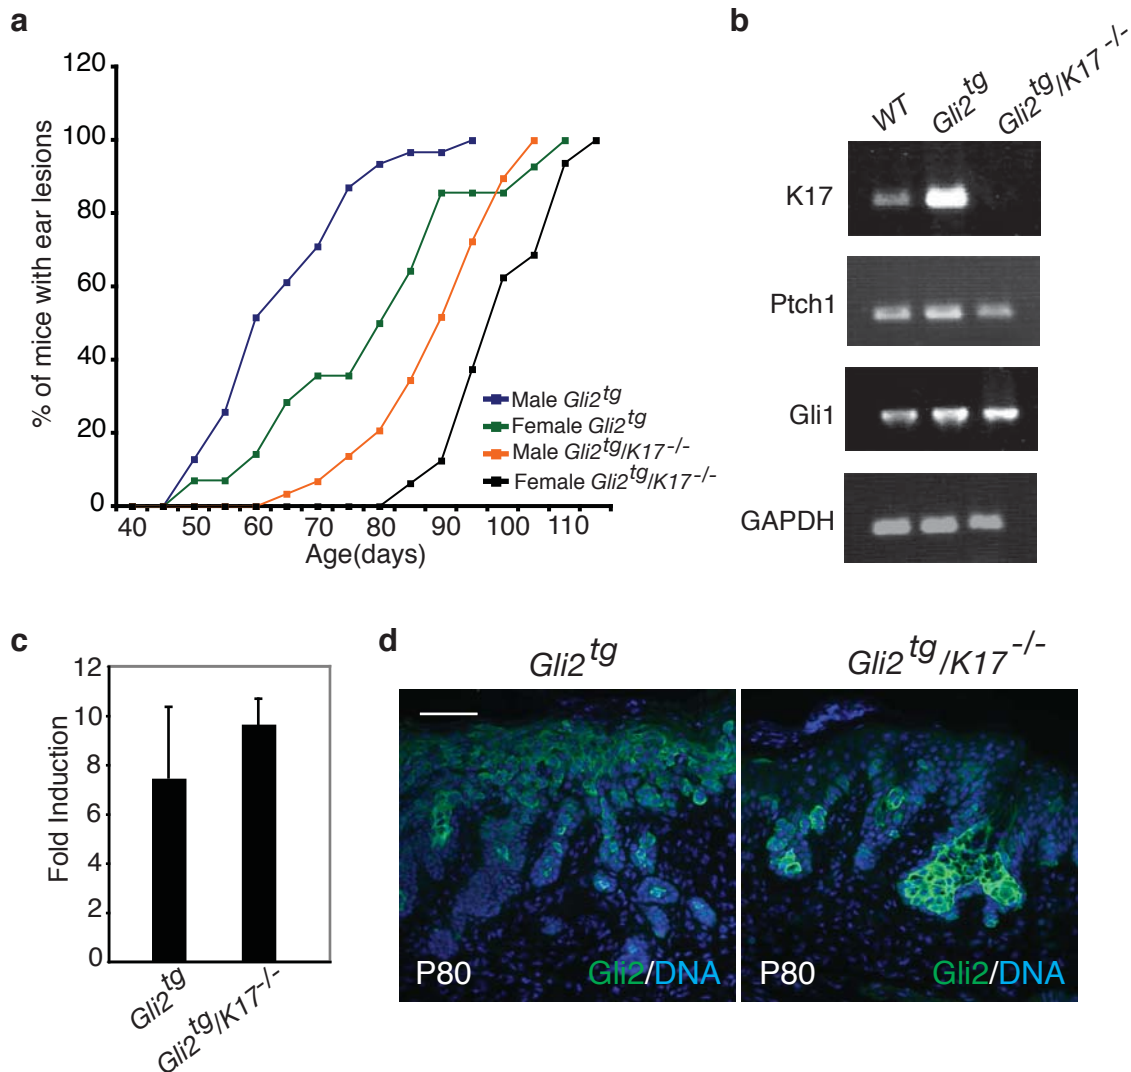

**Analysis of tumor onset and associated histological attributes in *Gli2tg* and *Gli2tg/K17*<sup>-/-</sup> mice.** (a) Tumor kinetics, related as the cumulative percentage of mice showing marked ear lesions in male and female *Gli2tg* and *Gli2tg/K17*<sup>-/-</sup> mice during the P40-P120 time frame. This representation complements the histogram shown in Figure 1B. (b) Semi-quantitative RT-PCR for targets of the Hedgehog signaling pathway (Patched 1, Gli1, and K17) in P80 ear tissue of male mice. GAPDH is used as an internal reference. (c) Relative luciferase activity of a Gli2 responsive reporter construct transfected (8xK17bs-luc; see Methods) into keratinocytes isolated from newborn *Gli2tg* and *Gli2tg/K17*<sup>-/-</sup> mice, and cultured. Data was normalized to fold induction over the pGL3-Basic vector (again, see Methods). Values reported as mean  $\pm$  s.e.m. ( $p < 0.05$ ). (d) Gli2 immunostainings of P80 *Gli2tg* and *Gli2tg/K17*<sup>-/-</sup> ear sections. Scale bar: 25 $\mu$ m.

**Supplemental Figure 3**  
DePianto et al.

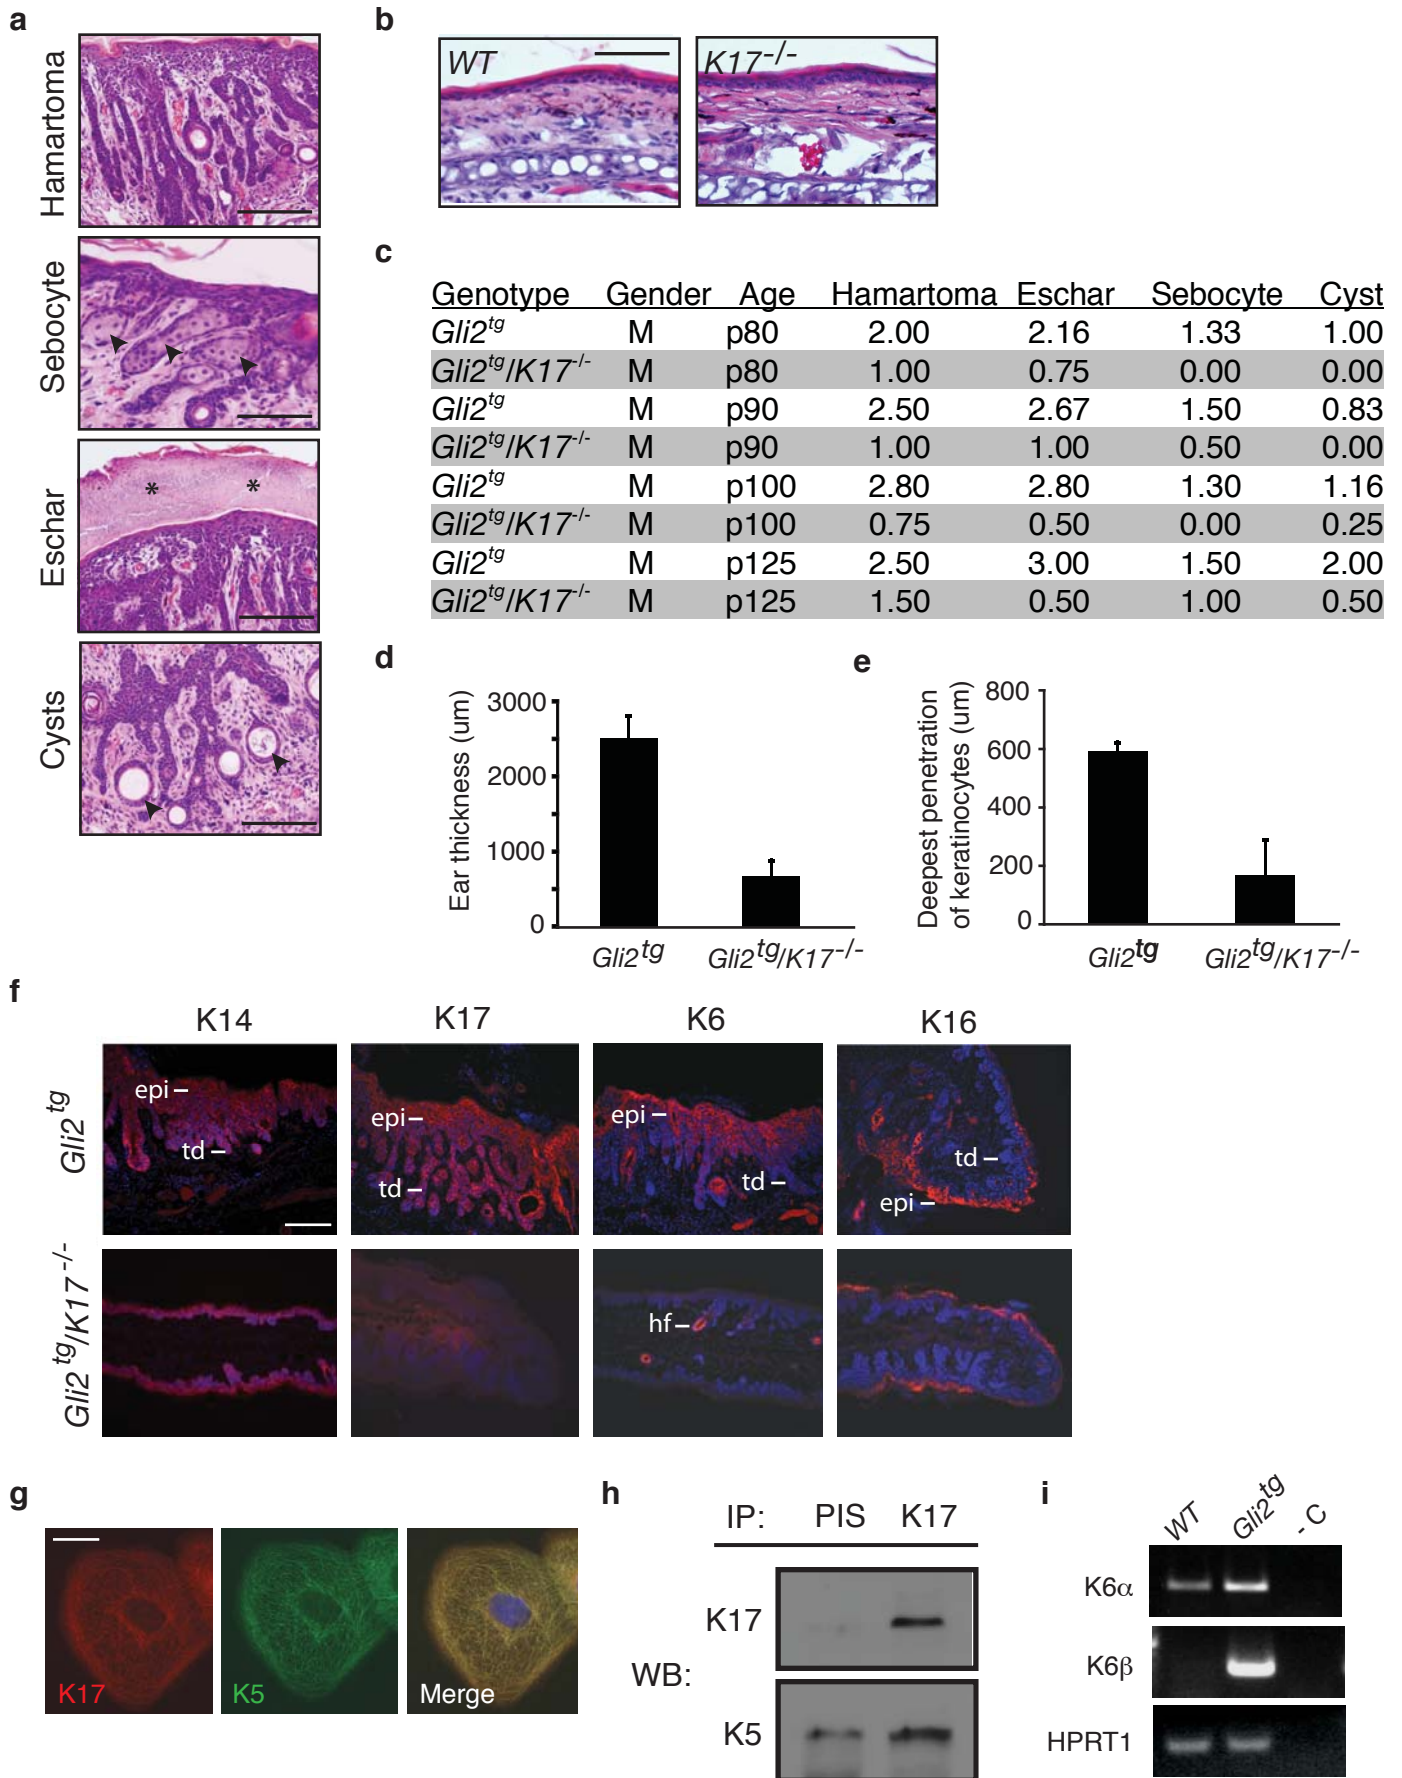

### Supplemental Figure 3

DePianto et al.

#### **Key histological features associated with development of ear lesion in *Gli2tg* mice.**

**(a)** Hamartoma, eschar (see asterisks), sebocytes (arrows), and cyst (arrows) lesions are individually featured. **(b)** Hematoxylin-eosin stained ear sections of P80 wildtype and *K17<sup>-/-</sup>* mice, depicting the normal histology that prevails in the absence of K17. Scale bar: 40 $\mu$ m. **(c)** Quantification of key histological features in *Gli2tg* and *Gli2tg/K17<sup>-/-</sup>* ear tissue at various ages. An experienced observer of skin tumors (author A.A.D.) scored slides in a blind fashion using a semi-quantitative scale for the features illustrated in a. Scale bars: hamartoma, eschar, cyst (50 $\mu$ m), sebocyte (25 $\mu$ m) **(d)** Thickness of whole ear tissue, in histological cross-sections, in P80 male *Gli2tg* and *Gli2tg/K17<sup>-/-</sup>* mice. **(e)** Measurement of deepest keratinocyte penetration into underlying dermal tissue in P80 male *Gli2tg* and *Gli2tg/K17<sup>-/-</sup>* mice. For C, D values are reported as mean  $\pm$  s.e.m. The difference between the two groups is statistically significant,  $p < 0.05$ . **(f)** Keratin expression in P80 male *Gli2tg* and *Gli2tg/K17<sup>-/-</sup>* ear tissue. The antigen being localized is identified on top. Scale bar, 50 $\mu$ m. **(g)** Co-localization of K5 and K14 proteins in *Gli2tg* primary keratinocytes visualized via indirect immunofluorescence. Scale bar: 20 $\mu$ m. **(h)** Co-immunoprecipitation of K5 and K17 from tissue extracts of *Gli2tg* ear lesions. Pre-immune sera (PIS) was used as a control. **(i)** Semi-quantitative RT-PCR for K6 isoform  $\alpha$  and  $\beta$  mRNAs expressed in ear lesions of *Gli2tg* mice. HPRT1 is used as an internal reference.



**Supplemental Figure 4**  
DePianto et al.

**a** Male mice @ p40

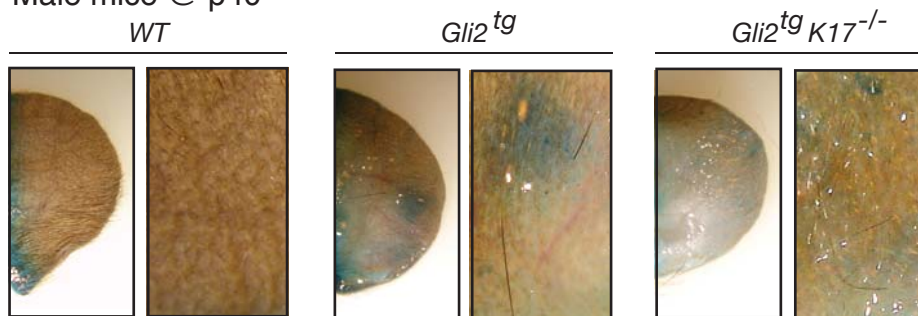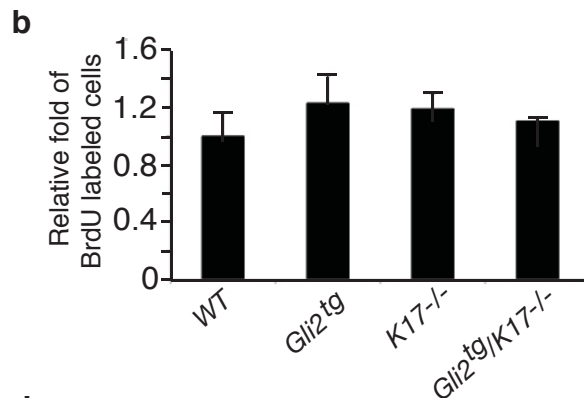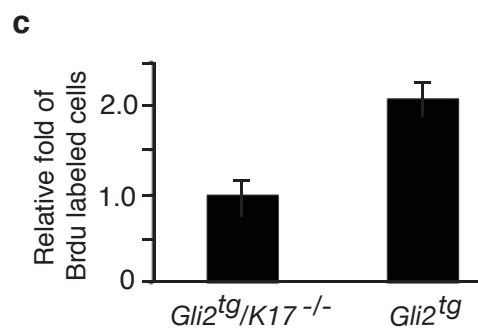

**d**

| Cytok/Chemok (Th1) | Fold Change | P-Value |
|--------------------|-------------|---------|
| Cxcl11             | -36.96      | 0.050   |
| Cxcl5              | -3.20       | 0.050   |
| Cxcl10             | -2.56       | 0.040   |
| Ccl9               | -2.13       | 0.195   |
| Ccl12              | -2.02       | 0.111   |
| Cxcl9              | -1.41       | 0.421   |
| IL1 $\beta$        | -1.50       | 0.358   |
| Ccr1               | 1.07        | 0.741   |

| Cytok/Chemok (Th2) | Fold Change | P-Value |
|--------------------|-------------|---------|
| IL20               | 1.35        | 0.353   |
| IL4                | -1.43       | 0.952   |
| IL13               | -1.55       | 0.139   |
| Ccl24              | -1.55       | 0.139   |
| Ccl17              | -1.70       | 0.247   |

**e**

| Cytok/Chemok (Th1) | Fold Change | P-Value |
|--------------------|-------------|---------|
| Cxcl11             | -1.17       | 0.668   |
| Cxcl5              | 3.00        | 0.001   |
| Cxcl10             | -1.17       | 0.668   |
| Ccl9               | -1.10       | 0.655   |
| Ccl12              | -1.10       | 0.111   |
| Cxcl9              | 96.92       | 0.001   |
| IL1 $\beta$        | -1.28       | 0.319   |
| Ccr1               | -1.17       | 0.668   |

| Cytok/Chemok (Th2) | Fold Change | P-Value |
|--------------------|-------------|---------|
| IL20               | 1.16        | 0.318   |
| IL4                | -1.10       | 0.538   |
| IL13               | -1.26       | 0.824   |
| Ccl24              | -1.12       | 0.951   |
| Ccl17              | -1.17       | 0.688   |

**Examination of inflammation and its effects in ear skin tissue and skin keratinocyte cultures.**

**(a)** Integrity of skin barrier in wildtype, *Gli2<sup>tg</sup>*, and *Gli2<sup>tg</sup>/K17<sup>-/-</sup>* mice. **(b)** Mitotic activity of wildtype, *K17<sup>-/-</sup>*, *Gli2<sup>tg</sup>*, and *Gli2<sup>tg</sup>/K17<sup>-/-</sup>* keratinocytes seeded in primary culture after isolation from newborn mice as gauged by BrdU incorporation. Values are reported as mean  $\pm$  s.e.m. **(c)** Quantification of BrdU incorporation in *Gli2<sup>tg</sup>* and *Gli2<sup>tg</sup>/K17<sup>-/-</sup>* keratinocytes in primary culture after a 12 hour treatment with 2 $\mu$ M TPA. Values are reported as mean  $\pm$  s.e.m. **(d)** qRT-PCR quantification of mRNA expression levels of various chemokines and cytokines from *Gli2<sup>tg</sup>/K17<sup>-/-</sup>* versus *Gli2<sup>tg</sup>* primary cell cultures treated for 12 hours with 2 $\mu$ M TPA. **(e)** qRT-PCR quantification of mRNA expression levels of various chemokines and cytokines from *Gli2<sup>tg</sup>/K17<sup>-/-</sup>* transfected with a K17 expression construct compared to mock-transfected *Gli2<sup>tg</sup>/K17<sup>-/-</sup>* keratinocytes in primary culture, after a 12 hour treatment with 2 $\mu$ M TPA. The data reported correspond to the average of three experiments.

## Supplemental Figure 5

DePianto et al.

**a**

| NF- $\kappa$ B Signaling | Fold Change | P-Value |
|--------------------------|-------------|---------|
| Traf2                    | -3.08       | 0.0057  |
| Irf1                     | -2.28       | 0.0031  |
| Tnfrsf1b                 | -1.96       | 0.0043  |
| Tlr2                     | -1.82       | 0.0165  |
| Rela                     | -1.75       | 0.0306  |
| Relb                     | -1.73       | 0.0118  |
| Jun                      | -1.69       | 0.0318  |
| Atf1                     | -1.37       | 0.0388  |
| Ripk2                    | -1.23       | 0.5151  |
| Akt1                     | -1.21       | 0.6387  |
| Ikkkb                    | -1.21       | 0.1923  |
| Tradd                    | 1.02        | 0.9134  |
| Icam1                    | 1.40        | 0.0280  |

**b**

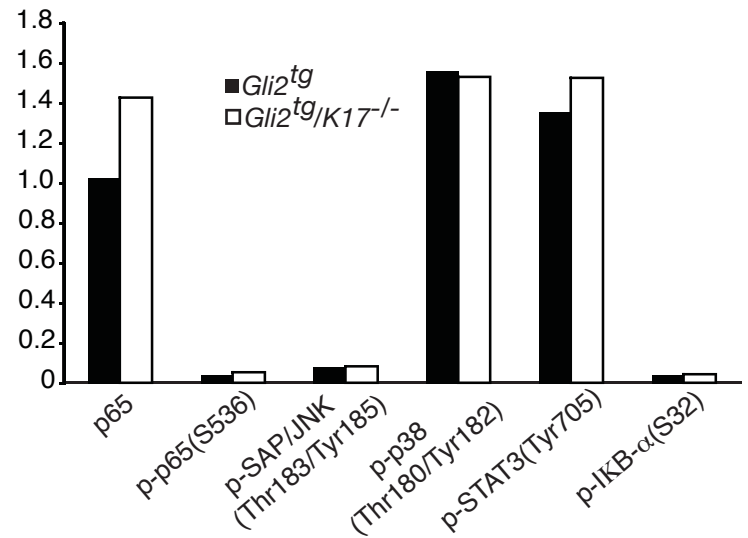

**c**

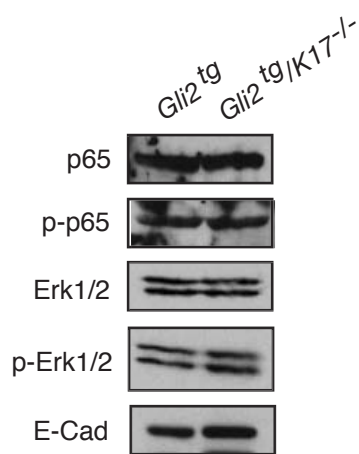

**d**

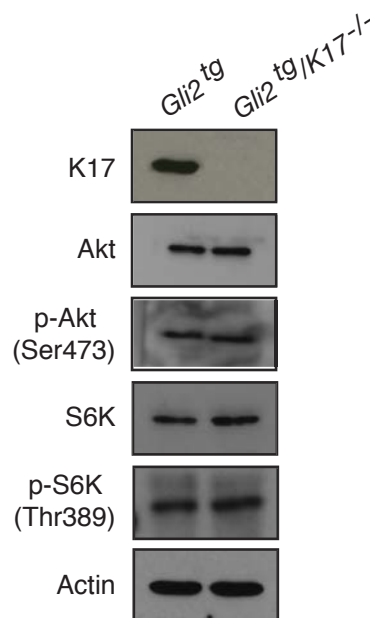

### Status of various signaling pathways in cultured skin keratinocytes and in P80 male ear tissue.

**(a)** NF $\kappa$ B signaling pathway activity in TPA-treated primary cultures of newborn *Gli2<sup>tg</sup>/K17<sup>-/-</sup>* versus *Gli2<sup>tg</sup>* skin keratinocytes examined via qPCR array. **(b)** Activation of inflammation and stress-related pathways were evaluated via ELISA assays on whole ear tissue. Data (average of three experiments) is normalized to p65 levels in *Gli2<sup>tg</sup>* mice. **(c)** Total and phosphorylated levels of p65 and Erk1/2 in whole ear skin tissue (P80 mice). E-cadherin is a loading control for epithelial cells. **(d)** Total and phosphorylated levels of Akt and S6K in primary keratinocyte cultures. Actin is used as a loading control.

**Supplementary Table 1 - Oligonucleotide primer pairs and reaction conditions**  
**used for the PCR-based detection of SELECT genes**  
*DePianto et al.* **or mRNA transcripts**

| <b><u>Gene/Transcript</u></b> | <b><u>Primer Sequence (5'-3')</u></b> | <b><u>PCR Parameters</u></b> |       |
|-------------------------------|---------------------------------------|------------------------------|-------|
| b-Globin intron               | Forward:                              | 94°C                         | 40sec |
|                               | TGCATATAAATTCTGGCTGGCG                | 58°C                         | 40sec |
|                               | Reverse:                              | 72°C                         | 40sec |
|                               | GCATGAACATGGTTAGCAGAGGG               | 27 cycles                    |       |
| K17 wt allele                 | Forward:                              | 94°C                         | 40sec |
|                               | GGCCAGGTGGGCGGCGAAATCAAC              | 62°C                         | 40sec |
|                               | Reverse:                              | 72°C                         | 40sec |
|                               | GAGCCTGGACCCTTCCCGAAGTCAG             | 35 cycles                    |       |
| K17 null allele               | Forward:                              | 94°C                         | 40sec |
|                               | GGCCAGGTGGGCGGCGAAATCAAC              | 62°C                         | 40sec |
|                               | Reverse:                              | 72°C                         | 40sec |
|                               | CGCAGCGCATCGCCTTCTATCGCCT             | 35 cycles                    |       |
| K5/Gli2 <sup>tg</sup>         | Forward:                              | 94°C                         | 40sec |
|                               | ACAAGGACGACGATGACAAG                  | 56°C                         | 60sec |
|                               | Reverse:                              | 72°C                         | 60sec |
|                               | AGTCCCCTCTCTTTCAGATG                  | 30 cycles                    |       |
| GAPDH                         | Forward:                              | 94°C                         | 40sec |
|                               | AAATGGTGAAGGTCGGTGT                   | 58°C                         | 50sec |
|                               | Reverse:                              | 72°C                         | 50sec |
|                               | ACTCCACGACATACTCAGCAC                 | 30 cycles                    |       |
| TSLP                          | Forward:                              | 94°C                         | 30sec |
|                               | TCAGGAGCCTCTTCATCCTGC                 | 57°C                         | 30sec |
|                               | Reverse:                              | 72°C                         | 45sec |
|                               | TGTTTTGGACTTCTTGTGCCA                 | 34 cycles                    |       |
| mDefb14                       | Forward:                              | 94°C                         | 40sec |
|                               | CATTATCTGCTATTTGTATTCC                | 54°C                         | 35sec |
|                               | Reverse:                              | 72°C                         | 45sec |
|                               | CTTTCGGCAGCATTTCGACC                  | 32 cycles                    |       |
| S100A8                        | Forward:                              | 94°C                         | 40sec |
|                               | GAAAATGGTCACTACTGAGTGTCCCT            | 65°C                         | 30sec |
|                               | Reverse:                              | 72°C                         | 45sec |
|                               | GACTTTATTCTGTAGACATATCCAG             | 33 cycles                    |       |

|           |                          |           |       |
|-----------|--------------------------|-----------|-------|
| HPRT1     | Forward:                 | 94°C      | 40sec |
|           | CACAGGACTAGAACACCTGC     | 50°C      | 30sec |
|           | Reverse:                 | 72°C      | 30sec |
|           | CTGGTGAAAAGGACCTCT       | 32 cycles |       |
| mGli1     | Forward                  | 95°C      | 50sec |
|           | GTCGGAAGTCCTATTCACGC     | 58°C      | 30sec |
|           | Reverse                  | 72°C      | 60sec |
|           | CAGTCTGCTCTCTTCCCTGC     | 32 cycles |       |
| K17 mRNA  | Forward:                 | 94°C      | 40sec |
|           | GGGAGCAGCAGAACCAGGAGTAC  | 60°C      | 30sec |
|           | Reverse:                 | 72°C      | 40sec |
|           | GTCTCAAGCATAGGAATGCTGGGG | 30 cycles |       |
| Patched-1 | Forward:                 | 94°C      | 40sec |
|           | CAGACCACGGTGTCTGGCATC    | 62°C      | 45sec |
|           | Reverse:                 | 72°C      | 45sec |
|           | GCAGAAGCCGTCACAGTGGTG    | 30 cycles |       |
